# Supplementary material
Source: publisher site journal article supplement (https://www.dovepress.com/article/334337)
Supplement: Supplementary file 1 [file get_supplementary_file.php]

**Supplementary materials**

**Whole blood expression pattern of inflammation and redox genes**

**in mild Alzheimer’s disease**

**Supplementary Table 1.** RT² Profiler™ PCR Array Human NFkB Signaling Pathway, PAHS-025Z, Qiagen.

| **Ligands and receptors**  *CD40 (TNFRSF5), CD83, EGFR, FASLG (TNFSF6), IL10, IL1A, IL1B, IL1R1, IL8, LTBR, NOD1 (CARD4), TLR1, TLR2, TLR3, TLR4, TLR6, TLR9, TNF, TNFRSF1A, TNFRSF10A, TNFRSF10B, TNFSF10.* | **Downstream signalling**  *BIRC2 (c-IAP2), FADD, IRAK1, IRAK2, IRF1, MYD88, RIPK1, TBK1, TICAM1 (TRIF), TNFAIP3, TRADD, TRAF2, TRAF3, TRAF6.* |
| --- | --- |
| **Transcription factors**  *NFKB1, NFKB2, REL, RELA, RELB.* |
| **Cytoplasmic sequestering/releasing of NF-κB**  *BCL3, CHUK (IKKa), IKBKB, IKBKG, NFKBIA, NFKBIE.* |
| **General immune response**  *CCL2 (MCP-1), CCL5 (RANTES), CSF1 (MCSF), CSF2 (GM-CSF), CSF3 (GCSF), ICAM1, IFNA1, IFNG, IL8, LTA (TNFB), TNF.* | **Other factors involved in the NF-κB pathway**  ***Kinases****: AKT1, MAP3K1, RAF1.*  ***Transcription factors****: ATF1, EGR1, ELK1, FOS, JUN, STAT1.*  ***Other genes****: CARD11, CASP1 (ICE), CASP8, CFLAR (CASPER), HMOX1, MALT1, PSIP1, RHOA, TIMP1.* |
| **Apoptosis**  *AGT, BCL2A1 (BCL-X), BCL2L1, BIRC3 (c-IAP1).* | **Pathway activity signature genes**  *BIRC3, CCL20, CD83, CXCL2, CXCL3, ICAM1, IL8, IRF1, NF-KB1, NF-KBIA, NF-KBIE, STX11, TIFA, TNF, TNFAIP2, TNFAIP3.* |

**Supplementary Table 2.** RT² Profiler™ PCR Array Human NFkB Signaling Targets, PAHS-225Z, Qiagen.

| **INFLAMMATION** | |
| --- | --- |
| **Cytokines & Chemokines**  *CCL11 (Eotaxin), CCL2 (MCP-1), CCL22 (MDC), CCL5 (RANTES), CSF1 (MCSF), CSF2 (GM-CSF), CSF3 (GCSF), CXCL1 (GRO1, GROa, SCYB1), CXCL10 (INP10), CXCL2 (GRO2, GROb, SCYB2), CXCL8 (IL8), CXCL9 (MIG), FASLG (TNFSF6), IFNB1, IFNG, IL12B, IL15, IL1A, IL1B, IL1RN, IL2, IL4, IL6, LTA (TNFB), LTB, TNF, TNFSF10 (TRAIL).* | **Acute inflammation**  *C3, CCL5 (RANTES), CFB, F3, F8, IL1A, IL1B, IL6, INS, STAT3, STAT5B.*  **Other Pro-Inflammatory Genes**  *AGT, AKT1, CCL11 (Eotaxin), CCL2 (MCP-1), CCL22 (MDC), CCR5, CD40 (TNFRSF5), CXCL1 (GRO1, GROa, SCYB1), CXCL10 (INP10), CXCL2 (GRO2, GROb, SCYB2), CXCL8 (IL8), CXCL9 (MIG), IL15, IL1RN, IL2, IL2RA (CD25), MYD88, PTGS2 (COX2), SELE, SELP, TNF, TNFRSF1B.* |
| **Immune ResponseS** | **APOPTOSIS and stress RESPONSES** |
| **Innate immunity**  *C3, CCL2 (MCP-1), CFB, IFNB1, IL12B, IL6, INS, MYD88, NFKBIA (IκBα, MAD3), STAT5B, TNF.*  **Adaptive immunity**  *C3, CCL2 (MCP-1), CD40 (TNFRSF5), CD80, ICAM1, IFNG, IL12B, IL1B, IL2, IL4, TRAF2.*  **Other immune response genes**  *D83, CXCL8 (IL8), FAS, FASLG (TNFSF6), IL1R2, LTA (TNFB), LTB, TNFSF10 (TRAIL).*  **Type I interferon responsive genes**  *ADM, CCL2 (MCP-1), CCL5 (RANTES), CD69, CD80, CDKN1A (p21CIP1, WAF1), CFB, CXCL10 (INP10), CXCL9 (MIG), IL15, IL1RN, IRF1, MYD88, NCOA, STAT1, TNFSF10 (TRAIL).* | **Apoptosis inducers**  *AGT, BIRC2 (c-IAP1), EGFR (ERBB1), FASLG (TNFSF6), GADD45B, IFNB1, IFNG, IL12B, IL2RA (CD25), IL4, INS, LTA (TNFB), MAP2K6 (MEK6, MKK6), MMP9, NQO1, NR4A2 (NURR1), PTGS2 (COX2) ,STAT1, TNFRSF1B, TNFSF10 (TRAIL), TP53 (p53), TRAF2.*  **Anti-Apoptotic factors**  *ADM, AKT1, BCL2A1 (BFL1), BCL2L1 (BCLXL), BIRC3 (c-IAP2), CCL2 (MCP-1), CDKN1A (p21CIP1, WAF1), CSF2 (GM-CSF), F3, FAS, IL1A, IL1B, IL2, IL6, MYD88, NFKBIA (IκBα, MAD3), SOD2 ,STAT5B, TNF, XIAP.*  **Stress Responses**  *ADM, AKT1, BCL2L1 (BCLXL), BIRC2 (c-IAP1), CCND1, CDKN1A (p21CIP1, WAF1), GADD45B, IFNG, IL1A, IL1B, MAP2K6 (MEK6, MKK6), NQO1, PDGFB, PLAU (UPA), SOD2, TNF, TP53 (p53), XIAP.* |
| **Differentiation & Development** | **NFkB Signalling** |
| **Lymphoid differentiation & development**  *D80, CD83, IL12B, IL15, IL2, IL2RA (CD25), IL4, IRF1, STAT5B, TP53 (p53), VCAM1.*  **Myeloid differentiation & development**  *CL5 (RANTES), CSF1 (MCSF), CSF2 (GM-CSF), CSF2RB, CSF3 (GCSF), IL4, MMP9, NFKBIA (IκBα, MAD3), STAT5B, TNF.*  **Nervous System Differentiation & Development**  *AGT, ALDH3A2, CXCL1 (GRO1, GROa, SCYB1), EGFR (ERBB1), EGR2, IFNG, NR4A2 (NURR1), SNAP25, SOD2, STAT3, TP53 (p53).* | **Transcription Factors**  *NFKB1, NFKB2, NFKBIA (IκBα, MAD3), RELB, STAT1.*  **Regulation of NFκB Signalling**  *BIRC2 (c-IAP1), CD40 (TNFRSF5), FASLG (TNFSF6), IL1B, MYD88, REL, RELA, TNF, TNFSF10 (TRAIL).*  **Transcription Factors NFκB Signalling**  *NFKB1, NFKB2, REL, RELA, RELB.*  **Other Transcription factors**  *GR2, IRF1, MYC, NR4A2 (NURR1) ,STAT1, STAT3, STAT5B, TP53 (p53).* |

**Supplementary Table 3.** RT² Profiler™ PCR Array Human Oxidative Stress Plus, PAHS-065Y, Qiagen

| **Endogenous antioxidant systems**  ***Glutathione peroxidases***: *GPX1, GPX2, GPX3, GPX4, GPX5, GSTP1, GSTZ1.*  ***Peroxiredoxins***: *PRDX1, PRDX2, PRDX3, PRDX4, PRDX5, PRDX6 (AOP2*).  ***Other peroxidases***: *CAT, CYBB, CYGB, DUOX1, DUOX2, EPX, LPO, MPO, PTGS1, PTGS2 (COX2), TPO, TTN.*  ***Other antioxidants***: *ALB, APOE, GSR, MT3, VIMP, SOD1, SOD3, SRXN1, TXNRD1, TXNRD2.* | **Metabolism of reactive oxygen species**  ***Superoxide dismutases***: *SOD1, SOD2, SOD3.*  ***Other genes involved in superoxide metabolism***: *ALOX12, CCS, DUOX1, DUOX2, MT3, NCF1, NCF2, NOS2 (iNOS), NOX4, NOX5, UCP2.*  ***Other genes involved in ROS metabolism***: *AOX1, BNIP3, EPHX2, MPV17, SFTPD.*  ***Oxygen transporters***: *CYGB, MB.* |
| --- | --- |
| **Oxidative stress responsive genes**  *APOE, ATOX1, CAT, CCL5 (RANTES), CYGB, DHCR24, DUOX1, DUOX2, DUSP1 (PTPN16), EPX, FOXM1, FTH1, GCLC, GCLM, GPX1, GPX2, GPX3, GPX4, GPX5, GSR, GSS, HMOX1, HSPA1A, KRT1, LPO, MBL2, MPO, MSRA, NQO1, NUDT1, PDLIM1, PRDX2, PRDX5, PRDX6 (AOP2), PRNP, RNF7, VIMP, SEPP1, SIRT2, SOD1, SOD2, SQSTM1, SRXN1, TPO, TTN, TXN, TXNRD1, TXNRD2.* | |
| **Pathway activity signature genes**  *AKR1C2, BAG2, FHL2, GCLM, GLA, HMOX1, HSP90AA1, LHPP, NCOA7, NQO1, PTGR1, SLC7A11, SPINK1, TRAPPC6A, TXN, TXNRD1****.*** | |

**Supplementary Table 4.** Over-represented transcription factor binding sites (TFBS) in the **dysregulated inflammatory genes** (48 genes with FC>1.5 and p<0.01, Figure 3A) analyzed by oPOSSUM 3.0. Columns refer to name of the transcription factor, the JASPAR ID of the transcription factor (JASPAR ID), the class and the family of TFs to which this TF belongs (Class and family, respectively), the information content or specificity of this TFBS profile's position weight matrix (IC), the GC content of the this TFBS profile (GC content), the number of genes in the included target set for which this TFBS was predicted within the searched regions (Target gene hits), the number of genes in the included target set for which this TFBS was NOT predicted within the searched regions (Target gene non-hits), the number of times this TFBS was detected within the searched regions of the target set of genes (Target TFBS hits), the rate of occurrence of this TFBS within the searched regions of the included target set of genes (Target TFBS rate) and negative natural logarithm of the probability that the number of hits *vs.* non-hits for the included target genes could have occurred by random (Fisher score). Transcription factors with scores higher than 1±SD are highlighted in bold caps: red. Rel family); blue, Ets family; orange, Zn finger family; green others. Colored genes correspond with colored dots in Figure 4A.

| Transcription factor | JASPAR ID | Class | Family | IC | GC Content | Target gene hits | Target gene non-hits | Target TFBS hits | Target TFBS nucleotide rate | Fisher score |
| --- | --- | --- | --- | --- | --- | --- | --- | --- | --- | --- |
| **RELA** | **MA0107.1** | **Ig-fold** | **Rel** | **14,76** | **0,57** | **32** | **15** | **77** | **0,014** | **17,19** |
| **NF-kappaB** | **MA0061.1** | **Ig-fold** | **Rel** | **13,35** | **0,62** | **33** | **14** | **83** | **0,015** | **14,71** |
| **NFKB1** | **MA0105.1** | **Ig-fold** | **Rel** | **15,63** | **0,76** | **21** | **26** | **37** | **0,008** | **12,64** |
| **REL** | **MA0101.1** | **Ig-fold** | **Rel** | **10,52** | **0,56** | **35** | **12** | **103** | **0,019** | **11,63** |
| **STAT1** | **MA0137.2** | **Ig-fold** | **Stat** | **13,12** | **0,45** | **22** | **25** | **32** | **0,009** | **6,46** |
| **ELK1** | **MA0028.1** | **Winged Helix-Turn-Helix** | **Ets** | **8,81** | **0,57** | **36** | **11** | **107** | **0,020** | **6,25** |
| **Klf4** | **MA0039.2** | **Zinc-coordinating** | **BetaBetaAlpha-zinc finger** | **12,62** | **0,77** | **36** | **11** | **192** | **0,036** | **6,24** |
| **GABPA** | **MA0062.2** | **Winged Helix-Turn-Helix** | **Ets** | **13,34** | **0,65** | **28** | **19** | **59** | **0,012** | **6,20** |
| **SP1** | **MA0079.2** | **Zinc-coordinating** | **BetaBetaAlpha-zinc finger** | **11,13** | **0,82** | **33** | **14** | **170** | **0,032** | **5,50** |
| **FEV** | **MA0156.1** | **Winged Helix-Turn-Helix** | **Ets** | **12,12** | **0,44** | **38** | **9** | **172** | **0,026** | **5,31** |
| **Egr1** | **MA0162.1** | **Zinc-coordinating** | **BetaBetaAlpha-zinc finger** | **14,46** | **0,74** | **20** | **27** | **30** | **0,006** | **4,72** |
| **SPI1** | **MA0080.2** | **Winged Helix-Turn-Helix** | **Ets** | **9,64** | **0,44** | **38** | **9** | **184** | **0,024** | **4,71** |
| Mycn | MA0104.2 | Zipper-Type | Helix-Loop-Helix | 11,10 | 0,70 | 24 | 23 | 58 | 0,011 | 4,57 |
| MZF1_5-13 | MA0057.1 | Zinc-coordinating | BetaBetaAlpha-zinc finger | 9,40 | 0,59 | 33 | 14 | 138 | 0,026 | 3,97 |
| Stat3 | MA0144.1 | Ig-fold | Stat | 13,60 | 0,51 | 26 | 21 | 45 | 0,008 | 3,75 |
| Hand1::Tcfe2a | MA0092.1 | Zipper-Type | Helix-Loop-Helix | 10,14 | 0,51 | 32 | 15 | 82 | 0,015 | 3,44 |
| EBF1 | MA0154.1 | Zipper-Type | Helix-Loop-Helix | 11,56 | 0,65 | 28 | 19 | 79 | 0,015 | 3,27 |
| MZF1_1-4 | MA0056.1 | Zinc-coordinating | BetaBetaAlpha-zinc finger | 8,59 | 0,73 | 38 | 9 | 349 | 0,039 | 3,24 |
| SPIB | MA0081.1 | Winged Helix-Turn-Helix | Ets | 9,06 | 0,47 | 39 | 8 | 277 | 0,036 | 3,14 |
| ELF5 | MA0136.1 | Winged Helix-Turn-Helix | Ets | 8,69 | 0,43 | 37 | 10 | 202 | 0,034 | 2,92 |
| IRF2 | MA0051.1 | Winged Helix-Turn-Helix | IRF | 21,13 | 0,41 | 4 | 43 | 4 | 0,001 | 2,57 |
| ZEB1 | MA0103.1 | Zinc-coordinating | BetaBetaAlpha-zinc finger | 8,31 | 0,56 | 38 | 9 | 276 | 0,031 | 2,55 |
| RUNX1 | MA0002.2 | Ig-fold | Runt | 10,40 | 0,50 | 31 | 16 | 97 | 0,020 | 2,43 |
| ZNF354C | MA0130.1 | Zinc-coordinating | BetaBetaAlpha-zinc finger | 8,96 | 0,62 | 38 | 9 | 344 | 0,038 | 2,43 |
| IRF1 | MA0050.1 | Winged Helix-Turn-Helix | IRF | 16,01 | 0,38 | 16 | 31 | 24 | 0,005 | 2,38 |
| Arnt | MA0004.1 | Zipper-Type | Helix-Loop-Helix | 10,99 | 0,64 | 18 | 29 | 42 | 0,005 | 2,36 |
| NFYA | MA0060.1 | Other Alpha-Helix | NFY CCAAT-binding | 12,93 | 0,52 | 15 | 32 | 17 | 0,005 | 2,07 |
| HIF1A::ARNT | MA0259.1 | Zipper-Type | Helix-Loop-Helix | 9,74 | 0,66 | 25 | 22 | 82 | 0,012 | 2,01 |
| NFATC2 | MA0152.1 | Ig-fold | Rel | 9,86 | 0,35 | 33 | 14 | 132 | 0,017 | 2,01 |
| MAX | MA0058.1 | Zipper-Type | Helix-Loop-Helix | 12,69 | 0,57 | 19 | 28 | 36 | 0,007 | 1,89 |
| ELK4 | MA0076.1 | Winged Helix-Turn-Helix | Ets | 14,12 | 0,58 | 15 | 32 | 17 | 0,003 | 1,89 |
| Ddit3::Cebpa | MA0019.1 | Zipper-Type | Leucine Zipper | 11,65 | 0,48 | 14 | 33 | 21 | 0,005 | 1,87 |
| Tcfcp2l1 | MA0145.1 | Other | CP2 | 11,65 | 0,61 | 24 | 23 | 58 | 0,015 | 1,84 |
| Myc | MA0147.1 | Zipper-Type | Helix-Loop-Helix | 11,16 | 0,69 | 19 | 28 | 44 | 0,008 | 1,63 |
| USF1 | MA0093.1 | Zipper-Type | Helix-Loop-Helix | 11,29 | 0,64 | 21 | 26 | 51 | 0,007 | 1,61 |
| Pax5 | MA0014.1 | Helix-Turn-Helix | Homeo | 12,43 | 0,58 | 4 | 43 | 4 | 0,001 | 1,60 |
| Zfx | MA0146.1 | Zinc-coordinating | BetaBetaAlpha-zinc finger | 13,08 | 0,75 | 22 | 25 | 78 | 0,020 | 1,58 |
| Arnt::Ahr | MA0006.1 | Zipper-Type | Helix-Loop-Helix | 9,53 | 0,72 | 29 | 18 | 115 | 0,013 | 1,53 |
| AP1 | MA0099.2 | Zipper-Type | Leucine Zipper | 9,19 | 0,41 | 34 | 13 | 154 | 0,020 | 1,45 |
| SRF | MA0083.1 | Other Alpha-Helix | MADS | 17,97 | 0,47 | 3 | 44 | 3 | 0,001 | 1,39 |
| INSM1 | MA0155.1 | Zinc-coordinating | BetaBetaAlpha-zinc finger | 14,86 | 0,67 | 17 | 30 | 31 | 0,007 | 1,38 |
| HOXA5 | MA0158.1 | Helix-Turn-Helix | Homeo | 8,76 | 0,32 | 36 | 11 | 223 | 0,033 | 1,34 |
| NR4A2 | MA0160.1 | Zinc-coordinating | Hormone-nuclear Receptor | 10,17 | 0,49 | 29 | 18 | 92 | 0,014 | 1,31 |
| Zfp423 | MA0116.1 | Zinc-coordinating | BetaBetaAlpha-zinc finger | 17,93 | 0,68 | 13 | 34 | 26 | 0,007 | 1,30 |
| TEAD1 | MA0090.1 | Helix-Turn-Helix | Homeo | 15,68 | 0,51 | 12 | 35 | 14 | 0,003 | 1,28 |
| NHLH1 | MA0048.1 | Zipper-Type | Helix-Loop-Helix | 14,13 | 0,67 | 13 | 34 | 19 | 0,004 | 1,23 |
| TBP | MA0108.2 | Beta-sheet | TATA-binding | 10,09 | 0,38 | 22 | 25 | 45 | 0,013 | 1,21 |
| TLX1::NFIC | MA0119.1 | Helix-Turn-Helix::Other | Homeo::Nuclear Factor I-CCAAT-binding | 19,67 | 0,60 | 3 | 44 | 3 | 0,001 | 1,11 |
| Gfi | MA0038.1 | Zinc-coordinating | BetaBetaAlpha-zinc finger | 9,47 | 0,39 | 28 | 19 | 95 | 0,018 | 1,08 |
| MIZF | MA0131.1 | Zinc-coordinating | BetaBetaAlpha-zinc finger | 13,20 | 0,61 | 5 | 42 | 6 | 0,001 | 1,02 |
| Nkx3-2 | MA0122.1 | Helix-Turn-Helix | Homeo | 8,54 | 0,46 | 31 | 16 | 123 | 0,021 | 1,02 |
| CEBPA | MA0102.2 | Zipper-Type | Leucine Zipper | 8,71 | 0,36 | 26 | 21 | 72 | 0,012 | 0,99 |
| FOXA1 | MA0148.1 | Winged Helix-Turn-Helix | Forkhead | 12,53 | 0,33 | 27 | 20 | 72 | 0,015 | 0,99 |
| ARID3A | MA0151.1 | Helix-Turn-Helix | Arid | 9,90 | 0,06 | 32 | 15 | 204 | 0,023 | 0,94 |
| Prrx2 | MA0075.1 | Helix-Turn-Helix | Homeo | 9,06 | 0,03 | 30 | 17 | 140 | 0,013 | 0,92 |
| Myb | MA0100.1 | Helix-Turn-Helix | Myb | 9,88 | 0,59 | 27 | 20 | 87 | 0,013 | 0,90 |
| CTCF | MA0139.1 | Zinc-coordinating | BetaBetaAlpha-zinc finger | 17,21 | 0,65 | 7 | 40 | 8 | 0,003 | 0,87 |
| FOXD1 | MA0031.1 | Winged Helix-Turn-Helix | Forkhead | 11,93 | 0,28 | 26 | 21 | 71 | 0,011 | 0,85 |
| FOXO3 | MA0157.1 | Winged Helix-Turn-Helix | Forkhead | 11,73 | 0,30 | 27 | 20 | 76 | 0,011 | 0,85 |
| Sox2 | MA0143.1 | Other Alpha-Helix | High Mobility Group | 12,95 | 0,36 | 6 | 41 | 6 | 0,002 | 0,81 |
| Pou5f1 | MA0142.1 | Helix-Turn-Helix | Homeo | 14,81 | 0,31 | 7 | 40 | 7 | 0,002 | 0,75 |
| MYC::MAX | MA0059.1 | Zipper-Type | Helix-Loop-Helix | 14,24 | 0,60 | 7 | 40 | 9 | 0,002 | 0,73 |
| ESR1 | MA0112.2 | Zinc-coordinating | Hormone-nuclear Receptor | 13,56 | 0,59 | 1 | 46 | 1 | 0,000 | 0,73 |
| Foxd3 | MA0041.1 | Winged Helix-Turn-Helix | Forkhead | 12,95 | 0,22 | 22 | 25 | 53 | 0,012 | 0,68 |
| Spz1 | MA0111.1 | Other | Other | 11,91 | 0,54 | 13 | 34 | 15 | 0,003 | 0,68 |
| YY1 | MA0095.1 | Zinc-coordinating | BetaBetaAlpha-zinc finger | 8,10 | 0,51 | 33 | 14 | 197 | 0,022 | 0,64 |
| RORA_2 | MA0072.1 | Zinc-coordinating | Hormone-nuclear Receptor | 17,43 | 0,37 | 7 | 40 | 9 | 0,002 | 0,64 |
| Tal1::Gata1 | MA0140.1 | Zipper-Type | Helix-Loop-Helix | 11,30 | 0,45 | 12 | 35 | 16 | 0,005 | 0,64 |
| NR3C1 | MA0113.1 | Zinc-coordinating | Hormone-nuclear Receptor | 14,75 | 0,43 | 5 | 42 | 5 | 0,002 | 0,64 |
| Foxa2 | MA0047.2 | Winged Helix-Turn-Helix | Forkhead | 13,27 | 0,32 | 22 | 25 | 44 | 0,010 | 0,56 |
| FOXI1 | MA0042.1 | Winged Helix-Turn-Helix | Forkhead | 13,18 | 0,26 | 22 | 25 | 61 | 0,014 | 0,55 |
| TAL1::TCF3 | MA0091.1 | Zipper-Type | Helix-Loop-Helix | 14,07 | 0,45 | 14 | 33 | 20 | 0,004 | 0,54 |
| Gata1 | MA0035.2 | Zinc-coordinating | GATA | 10,88 | 0,37 | 27 | 20 | 97 | 0,020 | 0,53 |
| Esrrb | MA0141.1 | Zinc-coordinating | Hormone-nuclear Receptor | 12,81 | 0,52 | 19 | 28 | 32 | 0,007 | 0,53 |
| Sox17 | MA0078.1 | Other Alpha-Helix | High Mobility Group | 10,50 | 0,38 | 26 | 21 | 68 | 0,011 | 0,51 |
| CREB1 | MA0018.2 | Zipper-Type | Leucine Zipper | 10,14 | 0,52 | 17 | 30 | 31 | 0,005 | 0,49 |
| Pdx1 | MA0132.1 | Helix-Turn-Helix | Homeo | 9,04 | 0,19 | 29 | 18 | 145 | 0,016 | 0,48 |
| PPARG::RXRA | MA0065.2 | Zinc-coordinating | Hormone-nuclear Receptor | 11,66 | 0,55 | 11 | 36 | 15 | 0,004 | 0,47 |
| NFE2L2 | MA0150.1 | Zipper-Type | Leucine Zipper | 14,39 | 0,49 | 10 | 37 | 11 | 0,002 | 0,43 |
| Sox5 | MA0087.1 | Other Alpha-Helix | High Mobility Group | 10,83 | 0,20 | 24 | 23 | 65 | 0,008 | 0,43 |
| SRY | MA0084.1 | Other Alpha-Helix | High Mobility Group | 9,19 | 0,24 | 27 | 20 | 95 | 0,016 | 0,40 |
| Lhx3 | MA0135.1 | Helix-Turn-Helix | Homeo | 16,35 | 0,13 | 10 | 37 | 20 | 0,005 | 0,37 |
| Foxq1 | MA0040.1 | Winged Helix-Turn-Helix | Forkhead | 14,07 | 0,20 | 14 | 33 | 18 | 0,004 | 0,36 |
| Myf | MA0055.1 | Zipper-Type | Helix-Loop-Helix | 15,91 | 0,61 | 18 | 29 | 50 | 0,011 | 0,36 |
| Evi1 | MA0029.1 | Zinc-coordinating | BetaBetaAlpha-zinc finger | 17,91 | 0,28 | 3 | 44 | 4 | 0,001 | 0,33 |
| PLAG1 | MA0163.1 | Zinc-coordinating | BetaBetaAlpha-zinc finger | 19,35 | 0,80 | 3 | 44 | 4 | 0,001 | 0,31 |
| HLF | MA0043.1 | Zipper-Type | Leucine Zipper | 11,15 | 0,39 | 9 | 38 | 10 | 0,002 | 0,29 |
| ESR2 | MA0258.1 | Zinc-coordinating | Hormone-nuclear Receptor | 13,62 | 0,55 | 3 | 44 | 3 | 0,001 | 0,22 |
| HNF4A | MA0114.1 | Zinc-coordinating | Hormone-nuclear Receptor | 9,62 | 0,52 | 10 | 37 | 15 | 0,004 | 0,21 |
| SOX9 | MA0077.1 | Other Alpha-Helix | High Mobility Group | 9,08 | 0,36 | 19 | 28 | 43 | 0,007 | 0,19 |
| NKX3-1 | MA0124.1 | Helix-Turn-Helix | Homeo | 11,13 | 0,18 | 21 | 26 | 71 | 0,009 | 0,17 |
| NFIL3 | MA0025.1 | Zipper-Type | Leucine Zipper | 14,14 | 0,27 | 10 | 37 | 15 | 0,003 | 0,15 |
| Nr2e3 | MA0164.1 | Zinc-coordinating | Hormone-nuclear Receptor | 12,03 | 0,37 | 9 | 38 | 10 | 0,001 | 0,12 |
| Nobox | MA0125.1 | Helix-Turn-Helix | Homeo | 9,57 | 0,26 | 22 | 25 | 78 | 0,012 | 0,11 |
| Pax6 | MA0069.1 | Helix-Turn-Helix | Homeo | 13,80 | 0,43 | 1 | 46 | 1 | 0,000 | 0,10 |
| PBX1 | MA0070.1 | Helix-Turn-Helix | Homeo | 14,64 | 0,31 | 5 | 42 | 9 | 0,002 | 0,10 |
| znf143 | MA0088.1 | Zinc-coordinating | BetaBetaAlpha-zinc finger | 17,54 | 0,53 | 1 | 46 | 1 | 0,000 | 0,08 |
| RXR::RAR_DR5 | MA0159.1 | Zinc-coordinating | Hormone-nuclear Receptor | 16,00 | 0,54 | 1 | 46 | 1 | 0,000 | 0,08 |
| Nkx2-5 | MA0063.1 | Helix-Turn-Helix | Homeo | 8,27 | 0,22 | 28 | 19 | 206 | 0,027 | 0,07 |
| NR2F1 | MA0017.1 | Zinc-coordinating | Hormone-nuclear Receptor | 15,92 | 0,48 | 4 | 43 | 4 | 0,001 | 0,06 |
| E2F1 | MA0024.1 | Winged Helix-Turn-Helix | E2F | 13,84 | 0,63 | 11 | 36 | 21 | 0,003 | 0,06 |
| MEF2A | MA0052.1 | Other Alpha-Helix | MADS | 15,71 | 0,18 | 9 | 38 | 13 | 0,002 | 0,06 |
| RREB1 | MA0073.1 | Zinc-coordinating | BetaBetaAlpha-zinc finger | 22,28 | 0,62 | 1 | 46 | 1 | 0,000 | 0,05 |
| FOXF2 | MA0030.1 | Winged Helix-Turn-Helix | Forkhead | 14,82 | 0,33 | 4 | 43 | 4 | 0,001 | 0,04 |
| T | MA0009.1 | Beta-Hairpin-Ribbon | T | 17,86 | 0,45 | 1 | 46 | 1 | 0,000 | 0,03 |
| HNF1A | MA0046.1 | Helix-Turn-Helix | Homeo | 15,55 | 0,26 | 2 | 45 | 2 | 0,001 | 0,02 |
| RORA_1 | MA0071.1 | Zinc-coordinating | Hormone-nuclear Receptor | 13,19 | 0,42 | 10 | 37 | 13 | 0,002 | 0,02 |
| HNF1B | MA0153.1 | Helix-Turn-Helix | Homeo | 16,82 | 0,22 | 2 | 45 | 3 | 0,001 | 0,00 |
| TP53 | MA0106.1 | Zinc-coordinating | Loop-Sheet-Helix | 26,24 | 0,60 | 0 | 47 | 0 | 0 | 0,00 |
| PPARG | MA0066.1 | Zinc-coordinating | Hormone-nuclear Receptor | 20,37 | 0,52 | 0 | 47 | 0 | 0 | 0,00 |
| NR1H2::RXRA | MA0115.1 | Zinc-coordinating | Hormone-nuclear Receptor | 27,88 | 0,45 | 0 | 47 | 0 | 0 | 0,00 |
| Pax4 | MA0068.1 | Helix-Turn-Helix | Homeo | 11,00 | 0,44 | 0 | 47 | 0 | 0 | 0,00 |
| EWSR1-FLI1 | MA0149.1 | Winged Helix-Turn-Helix | Ets | 32,87 | 0,55 | 0 | 47 | 0 | 0 | 0,00 |
| REST | MA0138.2 | Zinc-coordinating | BetaBetaAlpha-zinc finger | 23,13 | 0,60 | 0 | 47 | 0 | 0 | 0,00 |
| RXRA::VDR | MA0074.1 | Zinc-coordinating | Hormone-nuclear Receptor | 20,45 | 0,53 | 0 | 47 | 0 | 0 | 0,00 |
| Ar | MA0007.1 | Zinc-coordinating | Hormone-nuclear Receptor | 15,70 | 0,50 | 0 | 47 | 0 | 0 | 0,00 |

**Supplementary Table 5.** Retrieved list of the over-represented transcription factor binding sites (TFBS) in the **dysregulated redox genes** (33 genes with FC>1.5-fold and p<0.05, Figure 3B) panel analyzed by opossum 3.0. Columns refers to name of the transcription factor (TF), the JASPAR ID of the transcription factor (JASPAR ID), the class and the family of TFs to which this TF belongs (Class and family, respectively), the information content or specificity of this TFBS profile's position weight matrix (IC), the GC content of the this TFBS profile (GC content), the number of genes in the included target set for which this TFBS was predicted within the searched regions (Target gene hits), the number of genes in the included target set for which this TFBS was NOT predicted within the searched regions (Target gene non-hits), the number of times this TFBS was detected within the searched regions of the target set of genes (Target TFBS hits), the rate of occurrence of this TFBS within the searched regions of the included target set of genes (Target TFBS rate) and negative natural logarithm of the probability that the number of hits vs. non-hits for the included target genes could have occurred by random (Fisher score). Conserving the color code depicted in Figure 4B, TF with scores higher than 1±SD are bold caps highlighted in orange (Zn-finger family), red (Rel family), purple (Helix-Loop-Helix family) and green (other families).

| TF | JASPAR ID | Class | Family | IC | GC Content | Target gene hits | Target gene non-hits | Target TFBS hits | Target TFBS nucleotide rate | Fisher score |
| --- | --- | --- | --- | --- | --- | --- | --- | --- | --- | --- |
| **Arnt** | **MA0004.1** | **Zipper-Type** | **Helix-Loop-Helix** | **10,99** | **0,64** | **14** | **19** | **22** | **0,0032** | **2,80** |
| **HIF1A::ARNT** | **MA0259.1** | **Zipper-Type** | **Helix-Loop-Helix** | **9,74** | **0,66** | **19** | **14** | **48** | **0,0094** | **2,48** |
| **Mycn** | **MA0104.2** | **Zipper-Type** | **Helix-Loop-Helix** | **11,10** | **0,70** | **15** | **18** | **30** | **0,0073** | **2,23** |
| **ZNF354C** | **MA0130.1** | **Zinc-coordinating** | **BetaBetaAlpha-zinc finger** | **8,96** | **0,62** | **27** | **6** | **223** | **0,0327** | **2,15** |
| **NFYA** | **MA0060.1** | **Other Alpha-Helix** | **NFY CCAAT-binding** | **12,93** | **0,52** | **11** | **22** | **17** | **0,0066** | **1,99** |
| **MAX** | **MA0058.1** | **Zipper-Type** | **Helix-Loop-Helix** | **12,69** | **0,57** | **14** | **19** | **28** | **0,0068** | **1,93** |
| **Myf** | **MA0055.1** | **Zipper-Type** | **Helix-Loop-Helix** | **15,91** | **0,61** | **17** | **16** | **31** | **0,0091** | **1,91** |
| **FOXF2** | **MA0030.1** | **Winged Helix-Turn-Helix** | **Forkhead** | **14,82** | **0,33** | **8** | **25** | **10** | **0,0034** | **1,78** |
| **EBF1** | **MA0154.1** | **Zipper-Type** | **Helix-Loop-Helix** | **11,56** | **0,65** | **18** | **15** | **46** | **0,0112** | **1,63** |
| **Arnt::Ahr** | **MA0006.1** | **Zipper-Type** | **Helix-Loop-Helix** | **9,53** | **0,72** | **21** | **12** | **77** | **0,0113** | **1,59** |
| **Egr1** | **MA0162.1** | **Zinc-coordinating** | **BetaBetaAlpha-zinc finger** | **14,46** | **0,74** | **11** | **22** | **12** | **0,0032** | **1,57** |
| **Zfp423** | **MA0116.1** | **Zinc-coordinating** | **BetaBetaAlpha-zinc finger** | **17,93** | **0,68** | **10** | **23** | **15** | **0,0055** | **1,56** |
| **Klf4** | **MA0039.2** | **Zinc-coordinating** | **BetaBetaAlpha-zinc finger** | **12,62** | **0,77** | **21** | **12** | **98** | **0,0239** | **1,56** |
| **SRY** | **MA0084.1** | **Other Alpha-Helix** | **High Mobility Group** | **9,19** | **0,24** | **22** | **11** | **98** | **0,0215** | **1,37** |
| **E2F1** | **MA0024.1** | **Winged Helix-Turn-Helix** | **E2F** | **13,84** | **0,63** | **13** | **20** | **23** | **0,0045** | **1,34** |
| **NFKB1** | **MA0105.1** | **Ig-fold** | **Rel** | **15,63** | **0,76** | **7** | **26** | **12** | **0,0032** | **1,32** |
| **MZF1_5-13** | **MA0057.1** | **Zinc-coordinating** | **BetaBetaAlpha-zinc finger** | **9,40** | **0,59** | **20** | **13** | **88** | **0,0215** | **1,24** |
| **Myc** | **MA0147.1** | **Zipper-Type** | **Helix-Loop-Helix** | **11,16** | **0,69** | **13** | **20** | **22** | **0,0054** | **1,23** |
| **Myb** | **MA0100.1** | **Helix-Turn-Helix** | **Myb** | **9,88** | **0,59** | **20** | **13** | **71** | **0,0139** | **1,19** |
| **NF-kappaB** | **MA0061.1** | **Ig-fold** | **Rel** | **13,35** | **0,62** | **13** | **20** | **29** | **0,0071** | **1,18** |
| **Zfx** | **MA0146.1** | **Zinc-coordinating** | **BetaBetaAlpha-zinc finger** | **13,08** | **0,75** | **15** | **18** | **43** | **0,0147** | **1,16** |
| **NFE2L2** | **MA0150.1** | **Zipper-Type** | **Leucine Zipper** | **14,39** | **0,49** | **9** | **24** | **14** | **0,0038** | **1,11** |
| SRF | MA0083.1 | Other Alpha-Helix | MADS | 17,97 | 0,47 | 2 | 31 | 2 | 0,0006 | 1,07 |
| RELA | MA0107.1 | Ig-fold | Rel | 14,76 | 0,57 | 11 | 22 | 21 | 0,0051 | 1,05 |
| MZF1_1-4 | MA0056.1 | Zinc-coordinating | BetaBetaAlpha-zinc finger | 8,59 | 0,73 | 24 | 9 | 237 | 0,0347 | 1,02 |
| Sox17 | MA0078.1 | Other Alpha-Helix | High Mobility Group | 10,50 | 0,38 | 20 | 13 | 73 | 0,0160 | 1,00 |
| SP1 | MA0079.2 | Zinc-coordinating | BetaBetaAlpha-zinc finger | 11,13 | 0,82 | 18 | 15 | 86 | 0,0210 | 1,00 |
| Spz1 | MA0111.1 | Other | Other | 11,91 | 0,54 | 10 | 23 | 17 | 0,0046 | 0,94 |
| AP1 | MA0099.2 | Zipper-Type | Leucine Zipper | 9,19 | 0,41 | 23 | 10 | 120 | 0,0205 | 0,88 |
| INSM1 | MA0155.1 | Zinc-coordinating | BetaBetaAlpha-zinc finger | 14,86 | 0,67 | 11 | 22 | 18 | 0,0053 | 0,84 |
| NR3C1 | MA0113.1 | Zinc-coordinating | Hormone-nuclear Receptor | 14,75 | 0,43 | 4 | 29 | 4 | 0,0018 | 0,83 |
| ELK1 | MA0028.1 | Winged Helix-Turn-Helix | Ets | 8,81 | 0,57 | 19 | 14 | 57 | 0,0139 | 0,78 |
| PLAG1 | MA0163.1 | Zinc-coordinating | BetaBetaAlpha-zinc finger | 19,35 | 0,80 | 3 | 30 | 3 | 0,0010 | 0,70 |
| Ar | MA0007.1 | Zinc-coordinating | Hormone-nuclear Receptor | 15,70 | 0,50 | 1 | 32 | 1 | 0,0005 | 0,67 |
| Nkx3-2 | MA0122.1 | Helix-Turn-Helix | Homeo | 8,54 | 0,46 | 21 | 12 | 80 | 0,0176 | 0,66 |
| TAL1::TCF3 | MA0091.1 | Zipper-Type | Helix-Loop-Helix | 14,07 | 0,45 | 10 | 23 | 11 | 0,0032 | 0,57 |
| YY1 | MA0095.1 | Zinc-coordinating | BetaBetaAlpha-zinc finger | 8,10 | 0,51 | 23 | 10 | 165 | 0,0242 | 0,56 |
| ELK4 | MA0076.1 | Winged Helix-Turn-Helix | Ets | 14,12 | 0,58 | 8 | 25 | 9 | 0,0020 | 0,56 |
| ESR2 | MA0258.1 | Zinc-coordinating | Hormone-nuclear Receptor | 13,62 | 0,55 | 3 | 30 | 3 | 0,0013 | 0,55 |
| PPARG::RXRA | MA0065.2 | Zinc-coordinating | Hormone-nuclear Receptor | 11,66 | 0,55 | 8 | 25 | 9 | 0,0033 | 0,54 |
| ZEB1 | MA0103.1 | Zinc-coordinating | BetaBetaAlpha-zinc finger | 8,31 | 0,56 | 23 | 10 | 201 | 0,0294 | 0,47 |
| USF1 | MA0093.1 | Zipper-Type | Helix-Loop-Helix | 11,29 | 0,64 | 12 | 21 | 27 | 0,0046 | 0,47 |
| FOXD1 | MA0031.1 | Winged Helix-Turn-Helix | Forkhead | 11,93 | 0,28 | 17 | 16 | 61 | 0,0119 | 0,46 |
| Ddit3::Cebpa | MA0019.1 | Zipper-Type | Leucine Zipper | 11,65 | 0,48 | 7 | 26 | 11 | 0,0032 | 0,45 |
| CTCF | MA0139.1 | Zinc-coordinating | BetaBetaAlpha-zinc finger | 17,21 | 0,65 | 4 | 29 | 5 | 0,0023 | 0,44 |
| NR4A2 | MA0160.1 | Zinc-coordinating | Hormone-nuclear Receptor | 10,17 | 0,49 | 18 | 15 | 69 | 0,0135 | 0,44 |
| SPIB | MA0081.1 | Winged Helix-Turn-Helix | Ets | 9,06 | 0,47 | 23 | 10 | 170 | 0,0291 | 0,44 |
| FEV | MA0156.1 | Winged Helix-Turn-Helix | Ets | 12,12 | 0,44 | 20 | 13 | 72 | 0,0141 | 0,43 |
| Nkx2-5 | MA0063.1 | Helix-Turn-Helix | Homeo | 8,27 | 0,22 | 22 | 11 | 159 | 0,0272 | 0,40 |
| FOXA1 | MA0148.1 | Winged Helix-Turn-Helix | Forkhead | 12,53 | 0,33 | 17 | 16 | 50 | 0,0134 | 0,39 |
| NHLH1 | MA0048.1 | Zipper-Type | Helix-Loop-Helix | 14,13 | 0,67 | 7 | 26 | 9 | 0,0026 | 0,39 |
| IRF2 | MA0051.1 | Winged Helix-Turn-Helix | IRF | 21,13 | 0,41 | 1 | 32 | 1 | 0,0004 | 0,38 |
| REL | MA0101.1 | Ig-fold | Rel | 10,52 | 0,56 | 13 | 20 | 36 | 0,0088 | 0,36 |
| CEBPA | MA0102.2 | Zipper-Type | Leucine Zipper | 8,71 | 0,36 | 16 | 17 | 44 | 0,0097 | 0,34 |
| Tcfcp2l1 | MA0145.1 | Other | CP2 | 11,65 | 0,61 | 13 | 20 | 36 | 0,0123 | 0,34 |
| SPI1 | MA0080.2 | Winged Helix-Turn-Helix | Ets | 9,64 | 0,44 | 20 | 13 | 83 | 0,0142 | 0,33 |
| RORA_2 | MA0072.1 | Zinc-coordinating | Hormone-nuclear Receptor | 17,43 | 0,37 | 4 | 29 | 6 | 0,0021 | 0,33 |
| ELF5 | MA0136.1 | Winged Helix-Turn-Helix | Ets | 8,69 | 0,43 | 21 | 12 | 99 | 0,0218 | 0,33 |
| RUNX1 | MA0002.2 | Ig-fold | Runt | 10,40 | 0,50 | 17 | 16 | 49 | 0,0132 | 0,32 |
| SOX9 | MA0077.1 | Other Alpha-Helix | High Mobility Group | 9,08 | 0,36 | 14 | 19 | 49 | 0,0108 | 0,32 |
| TEAD1 | MA0090.1 | Helix-Turn-Helix | Homeo | 15,68 | 0,51 | 6 | 27 | 9 | 0,0026 | 0,32 |
| NFATC2 | MA0152.1 | Ig-fold | Rel | 9,86 | 0,35 | 19 | 14 | 90 | 0,0154 | 0,31 |
| NR2F1 | MA0017.1 | Zinc-coordinating | Hormone-nuclear Receptor | 15,92 | 0,48 | 4 | 29 | 5 | 0,0017 | 0,28 |
| GABPA | MA0062.2 | Winged Helix-Turn-Helix | Ets | 13,34 | 0,65 | 11 | 22 | 19 | 0,0051 | 0,28 |
| RORA_1 | MA0071.1 | Zinc-coordinating | Hormone-nuclear Receptor | 13,19 | 0,42 | 10 | 23 | 19 | 0,0046 | 0,27 |
| Esrrb | MA0141.1 | Zinc-coordinating | Hormone-nuclear Receptor | 12,81 | 0,52 | 12 | 21 | 27 | 0,0079 | 0,27 |
| TLX1::NFIC | MA0119.1 | Helix-Turn-Helix::Other | Homeo::Nuclear Factor I-CCAAT-binding | 19,67 | 0,60 | 1 | 32 | 1 | 0,0003 | 0,27 |
| HLF | MA0043.1 | Zipper-Type | Leucine Zipper | 11,15 | 0,39 | 6 | 27 | 8 | 0,0023 | 0,26 |
| MIZF | MA0131.1 | Zinc-coordinating | BetaBetaAlpha-zinc finger | 13,20 | 0,61 | 2 | 31 | 2 | 0,0005 | 0,25 |
| HOXA5 | MA0158.1 | Helix-Turn-Helix | Homeo | 8,76 | 0,32 | 22 | 11 | 176 | 0,0344 | 0,25 |
| HNF4A | MA0114.1 | Zinc-coordinating | Hormone-nuclear Receptor | 9,62 | 0,52 | 7 | 26 | 10 | 0,0032 | 0,24 |
| TBP | MA0108.2 | Beta-sheet | TATA-binding | 10,09 | 0,38 | 12 | 21 | 30 | 0,0110 | 0,23 |
| Pax6 | MA0069.1 | Helix-Turn-Helix | Homeo | 13,80 | 0,43 | 1 | 32 | 1 | 0,0003 | 0,21 |
| Pax5 | MA0014.1 | Helix-Turn-Helix | Homeo | 12,43 | 0,58 | 1 | 32 | 1 | 0,0005 | 0,21 |
| Nobox | MA0125.1 | Helix-Turn-Helix | Homeo | 9,57 | 0,26 | 16 | 17 | 60 | 0,0117 | 0,20 |
| FOXO3 | MA0157.1 | Winged Helix-Turn-Helix | Forkhead | 11,73 | 0,30 | 16 | 17 | 56 | 0,0109 | 0,20 |
| Gata1 | MA0035.2 | Zinc-coordinating | GATA | 10,88 | 0,37 | 17 | 16 | 58 | 0,0156 | 0,19 |
| Stat3 | MA0144.1 | Ig-fold | Stat | 13,60 | 0,51 | 11 | 22 | 18 | 0,0044 | 0,19 |
| znf143 | MA0088.1 | Zinc-coordinating | BetaBetaAlpha-zinc finger | 17,54 | 0,53 | 1 | 32 | 1 | 0,0005 | 0,18 |
| Gfi | MA0038.1 | Zinc-coordinating | BetaBetaAlpha-zinc finger | 9,47 | 0,39 | 16 | 17 | 65 | 0,0159 | 0,18 |
| CREB1 | MA0018.2 | Zipper-Type | Leucine Zipper | 10,14 | 0,52 | 10 | 23 | 22 | 0,0043 | 0,17 |
| Sox5 | MA0087.1 | Other Alpha-Helix | High Mobility Group | 10,83 | 0,20 | 15 | 18 | 58 | 0,0099 | 0,17 |
| IRF1 | MA0050.1 | Winged Helix-Turn-Helix | IRF | 16,01 | 0,38 | 6 | 27 | 11 | 0,0032 | 0,16 |
| MYC::MAX | MA0059.1 | Zipper-Type | Helix-Loop-Helix | 14,24 | 0,60 | 3 | 30 | 3 | 0,0008 | 0,16 |
| FOXI1 | MA0042.1 | Winged Helix-Turn-Helix | Forkhead | 13,18 | 0,26 | 13 | 20 | 35 | 0,0103 | 0,15 |
| Hand1::Tcfe2a | MA0092.1 | Zipper-Type | Helix-Loop-Helix | 10,14 | 0,51 | 15 | 18 | 52 | 0,0127 | 0,14 |
| Tal1::Gata1 | MA0140.1 | Zipper-Type | Helix-Loop-Helix | 11,30 | 0,45 | 6 | 27 | 6 | 0,0026 | 0,14 |
| RREB1 | MA0073.1 | Zinc-coordinating | BetaBetaAlpha-zinc finger | 22,28 | 0,62 | 1 | 32 | 1 | 0,0005 | 0,13 |
| Foxq1 | MA0040.1 | Winged Helix-Turn-Helix | Forkhead | 14,07 | 0,20 | 8 | 25 | 13 | 0,0035 | 0,12 |
| Nr2e3 | MA0164.1 | Zinc-coordinating | Hormone-nuclear Receptor | 12,03 | 0,37 | 6 | 27 | 11 | 0,0019 | 0,12 |
| STAT1 | MA0137.2 | Ig-fold | Stat | 13,12 | 0,45 | 6 | 27 | 10 | 0,0037 | 0,12 |
| Foxd3 | MA0041.1 | Winged Helix-Turn-Helix | Forkhead | 12,95 | 0,22 | 12 | 21 | 50 | 0,0146 | 0,11 |
| Sox2 | MA0143.1 | Other Alpha-Helix | High Mobility Group | 12,95 | 0,36 | 2 | 31 | 2 | 0,0007 | 0,10 |
| Lhx3 | MA0135.1 | Helix-Turn-Helix | Homeo | 16,35 | 0,13 | 5 | 28 | 14 | 0,0044 | 0,09 |
| T | MA0009.1 | Beta-Hairpin-Ribbon | T | 17,86 | 0,45 | 1 | 32 | 1 | 0,0003 | 0,09 |
| Foxa2 | MA0047.2 | Winged Helix-Turn-Helix | Forkhead | 13,27 | 0,32 | 12 | 21 | 33 | 0,0097 | 0,08 |
| HNF1A | MA0046.1 | Helix-Turn-Helix | Homeo | 15,55 | 0,26 | 2 | 31 | 4 | 0,0014 | 0,08 |
| PBX1 | MA0070.1 | Helix-Turn-Helix | Homeo | 14,64 | 0,31 | 3 | 30 | 5 | 0,0015 | 0,07 |
| Evi1 | MA0029.1 | Zinc-coordinating | BetaBetaAlpha-zinc finger | 17,91 | 0,28 | 1 | 32 | 1 | 0,0003 | 0,07 |
| Pdx1 | MA0132.1 | Helix-Turn-Helix | Homeo | 9,04 | 0,19 | 17 | 16 | 98 | 0,0144 | 0,07 |
| NKX3-1 | MA0124.1 | Helix-Turn-Helix | Homeo | 11,13 | 0,18 | 12 | 21 | 61 | 0,0104 | 0,03 |
| HNF1B | MA0153.1 | Helix-Turn-Helix | Homeo | 16,82 | 0,22 | 2 | 31 | 3 | 0,0009 | 0,02 |
| ARID3A | MA0151.1 | Helix-Turn-Helix | Arid | 9,90 | 0,06 | 16 | 17 | 143 | 0,0209 | 0,02 |
| NFIL3 | MA0025.1 | Zipper-Type | Leucine Zipper | 14,14 | 0,27 | 4 | 29 | 11 | 0,0030 | 0,01 |
| Prrx2 | MA0075.1 | Helix-Turn-Helix | Homeo | 9,06 | 0,03 | 14 | 19 | 79 | 0,0096 | 0,01 |
| MEF2A | MA0052.1 | Other Alpha-Helix | MADS | 15,71 | 0,18 | 4 | 29 | 9 | 0,0022 | 0,01 |
| TP53 | MA0106.1 | Zinc-coordinating | Loop-Sheet-Helix | 26,24 | 0,60 | 0 | 33 | 0 | 0 | 0,00 |
| PPARG | MA0066.1 | Zinc-coordinating | Hormone-nuclear Receptor | 20,37 | 0,52 | 0 | 33 | 0 | 0 | 0,00 |
| NR1H2::RXRA | MA0115.1 | Zinc-coordinating | Hormone-nuclear Receptor | 27,88 | 0,45 | 0 | 33 | 0 | 0 | 0,00 |
| Pax4 | MA0068.1 | Helix-Turn-Helix | Homeo | 11,00 | 0,44 | 0 | 33 | 0 | 0 | 0,00 |
| EWSR1-FLI1 | MA0149.1 | Winged Helix-Turn-Helix | Ets | 32,87 | 0,55 | 0 | 33 | 0 | 0 | 0,00 |
| REST | MA0138.2 | Zinc-coordinating | BetaBetaAlpha-zinc finger | 23,13 | 0,60 | 0 | 33 | 0 | 0 | 0,00 |
| ESR1 | MA0112.2 | Zinc-coordinating | Hormone-nuclear Receptor | 13,56 | 0,59 | 0 | 33 | 0 | 0 | 0,00 |
| RXRA::VDR | MA0074.1 | Zinc-coordinating | Hormone-nuclear Receptor | 20,45 | 0,53 | 0 | 33 | 0 | 0 | 0,00 |
| RXR::RAR_DR5 | MA0159.1 | Zinc-coordinating | Hormone-nuclear Receptor | 16,00 | 0,54 | 0 | 33 | 0 | 0 | 0,00 |
| Pou5f1 | MA0142.1 | Helix-Turn-Helix | Homeo | 14,81 | 0,31 | 0 | 33 | 0 | 0 | 0,00 |

**Supplementary Table 6.** Selected inflammation and redox genes that are significantly overexpressed (FC>1.5) in the group of mild AD patients as compared to controls, and exhibit AUC values ≥ 0.9. *Mean values are reported as 2^DCT; ** The effect size was calculated according to the formula **r = z/√N** recommended for non-parametric data

| **Gene** | **AD** | | **CTRL** | | **95% CI** | | **Effect size**** | **FC** | **p-value** | **AUC** |
| --- | --- | --- | --- | --- | --- | --- | --- | --- | --- | --- |
| **Mean*** | **SD** | **Mean*** | **SD** | **Lower** | **Upper** |
| ***AKT1*** | .7435 | .2884 | .3159 | .1302 | 0.29 | 0.50 | **0.77** | 2.35 | <0.001 | .9460 |
| ***CSF2RB*** | .4921 | .2967 | .1346 | .1172 | 0.223 | 0.380 | **0.75** | 3.66 | <0.001 | .9310 |
| ***IL2RA*** | .0294 | .0105 | .0108 | .0059 | 0.014 | 0.022 | **0.77** | 2.73 | <0.001 | .9450 |
| ***NFKB2*** | .3534 | .1681 | .1279 | .0510 | 0.138 | 0.272 | **0.78** | 2.76 | <0.001 | .9480 |
| ***RELB*** | .1003 | .0551 | .0241 | .0080 | 0.047 | 0.084 | **0.81** | 4.15 | <0.001 | .9690 |
| ***STAT5B*** | 1.3253 | .4579 | .6611 | .3072 | 0.476 | 0.785 | **0.73** | 2.00 | <0.001 | .9200 |
| ***TBK1*** | .2525 | .1089 | .1236 | .0441 | 0.082 | 0.138 | **0.72** | 2.04 | <0.001 | .9160 |
| ***TNFRSF1B*** | 1.2699 | .5409 | .4455 | .2507 | 0.549 | 0.969 | **0.79** | 2.85 | <0.001 | .9560 |
| ***TP53*** | .1696 | .0488 | .0782 | .0416 | 0.074 | 0.110 | **0.75** | 2.17 | <0.001 | .9320 |
| ***DUOX1*** | .0226 | .0098 | .0072 | .0065 | 0.012 | 0.018 | **0.74** | 3.13 | <0.001 | .9250 |
| ***FOXM1*** | .0245 | .0103 | .0086 | .0064 | 0.011 | 0.020 | **0.72** | 2.84 | <0.001 | .9170 |
| ***GSR*** | .0329 | .0151 | .0084 | .0053 | 0.019 | 0.025 | **0.84** | 3.93 | <0.001 | .9850 |
| ***GSTP1*** | 1.0551 | .3071 | .4250 | .1874 | 0.507 | 0.741 | **0.81** | 2.48 | <0.001 | .9690 |
| ***NCF1*** | 5.4977 | 3.8947 | 1.7135 | .9008 | 2.43 | 3.66 | **0.81** | 3.21 | <0.001 | .9670 |
| ***TRAPPC6A*** | .0548 | .0147 | .0225 | .0082 | 0.026 | 0.037 | **0.84** | 2.44 | <0.001 | .9850 |
| ***TXNRD2*** | .0227 | .0095 | .0102 | .0068 | 0.009 | 0.015 | **0.69** | 2.23 | <0.001 | .9000 |
| ***CCR5*** | .4788 | .1541 | .2481 | .1000 | 0.165 | 0.300 | **0.70** | 1.93 | <0.001 | .9050 |
| ***RHOA*** | 2.6452 | .8308 | 1.3763 | .4700 | 0.875 | 1.391 | **0.78** | 1.92 | <0.001 | .9500 |
| ***GSTZ1*** | .0229 | .0108 | .0115 | .0085 | 0.008 | 0.014 | **0.70** | 1.99 | <0.001 | .9040 |

**Supplementary Table 7. Putative RELA, RELB and NFKB1 binding sites in redox-related genes.** The first four columns describe the gene containing the transcription factor binding sites and their specific locations according to the GRCh37 (hg19) human genome assembly. Relative scores are calculated against the consensus binding sequence according to the position frequency matrix of the JASPAR database. Motif column contains the specific sequence that was identified. Predicted Functional Element provides the segmentation annotation from the Combined Segmentation Track at UCSC Genome Browser. E: Enhancer; TSS: Transcription start site.

| **RELA** | | | | | | | |
| --- | --- | --- | --- | --- | --- | --- | --- |
| Gene | Chr | Start | End | Relative Score | Strand | Motif | Predicted  Functional Element |
| GSTP1 | 11 | 67349095 | 67349105 | 0.959 | - | TGGAATTTCC | TSS |
| 11 | 67350962 | 67350972 | 1 | + | GGGAATTTCC | TSS |
| 11 | 67350963 | 67350973 | 0.936 | - | GGGAAATTCC | TSS |
| NFKBIA | 14 | 35872463 | 35872473 | 0.908 | + | GGGTATTTCC | TSS |
| 14 | 35873168 | 35873178 | 0.963 | + | GGGACTTTCC | TSS |
| 14 | 35874026 | 35874036 | 1 | + | GGGAATTTCC | TSS |
| 14 | 35874281 | 35874291 | 0.915 | + | TGGGGTTTCC | TSS |
| DUOX1 | 15 | 45427332 | 45427342 | 0.971 | - | GGGAGTTTCC | E |
| **RELB** | | | | | | | |
| Gene | Chr | Start | End | Relative Score | Strand | Motif | Predicted Functional Element |
| NFKBIA | 14 | 35873315 | 35873326 | 0.904 | - | GAAGTCCCCGG | TSS |
| 14 | 35874023 | 35874034 | 0.966 | - | AAATTCCCCGA | TSS |
| 14 | 35873994 | 35874005 | 0.907 | - | GAAATCCCCAG | TSS |
| **NFKB1** | | | | | | | |
| Gene | Chr | Start | End | Relative Score | Strand | Motif | Predicted Functional Element |
| GSTP1 | 11 | 67350962 | 67350973 | 0.913 | + | GGGAATTTCCC | TSS |
| SQSTM1 | 5 | 179246072 | 179246083 | 0.977 | + | GGGGATCCCCC | TSS, E |
| 5 | 179246165 | 179246176 | 0.912 | + | GGGGGTTCCCG | TSS, E |
| 5 | 179246072 | 179246083 | 0.958 | - | GGGGGATCCCC | TSS, E |
| 5 | 179246071 | 179246082 | 0.907 | - | GGGGATCCCCG | TSS, E |

**Supplementary Figure 1.** Heat map of the expression of inflammation genes with FC<1.5 in the blood of mild AD patients and controls (CTRL).


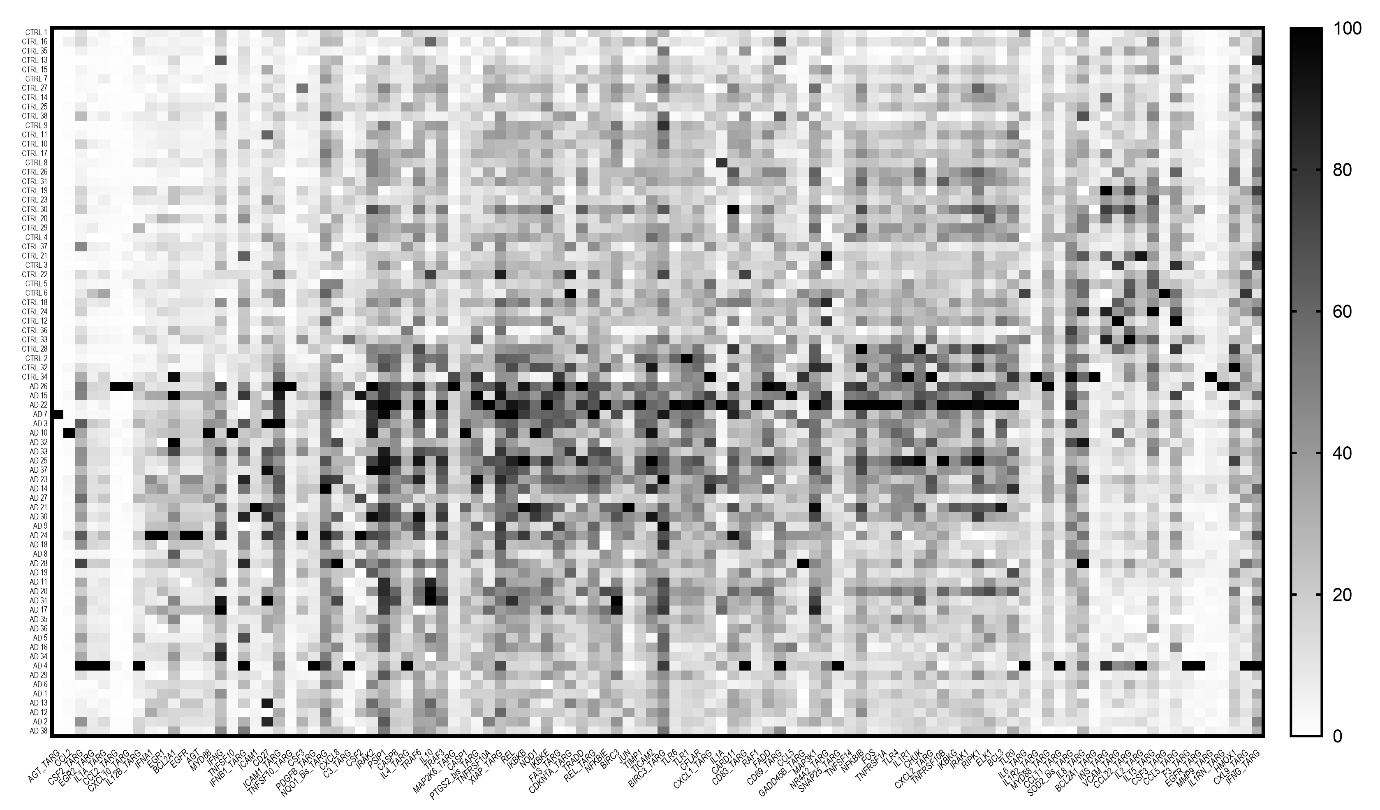


**Supplementary Figure 2.** Heat map of the expression of redox genes with FC<1.5 in the blood of mild AD patients and controls (CTRL).

**
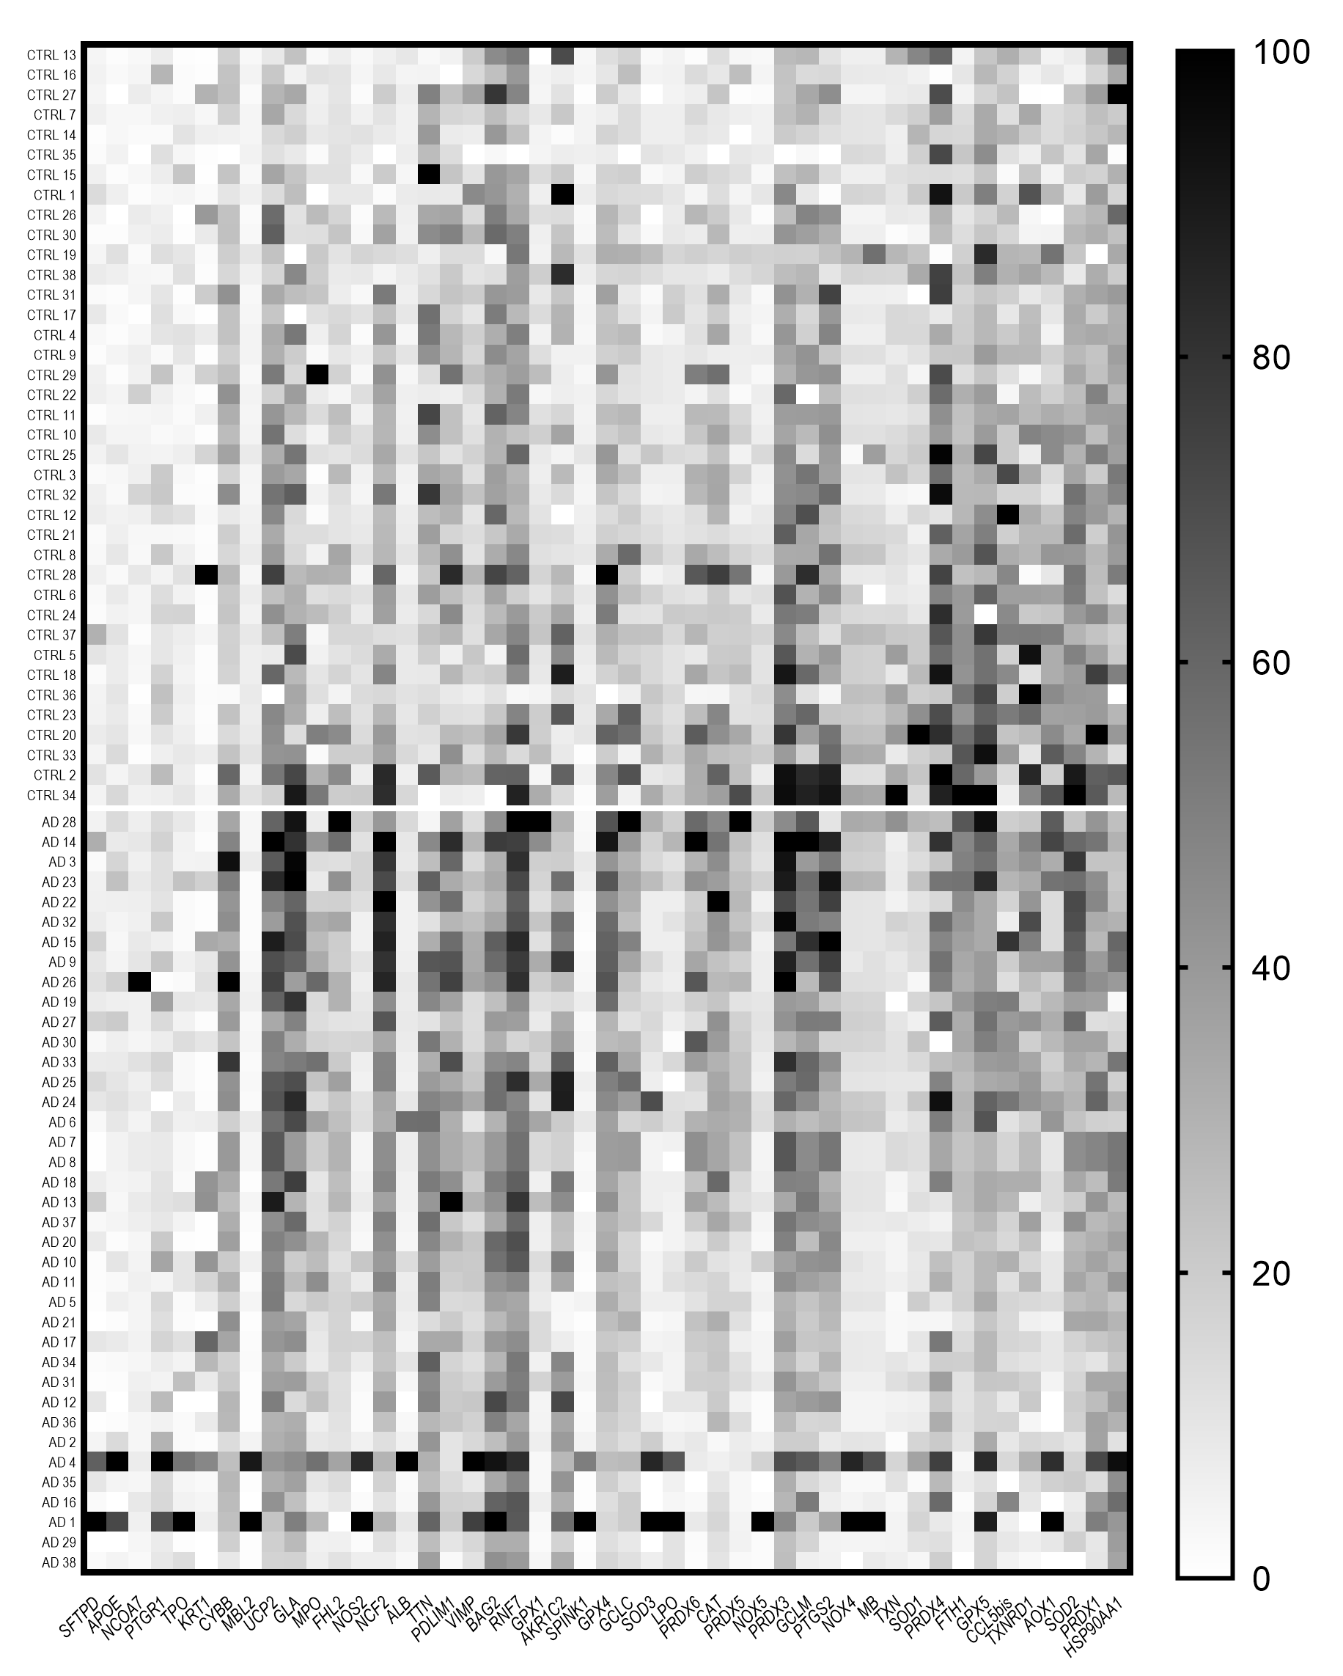
**

**Supplementary file 1**

This Jupyter Notebook provides the code needed to:

• Retrieve ChIP-seq peaks for a given transcription factor provided as a BED interval file.

• Intersect the peaks with a defined region of the hg19 human genome, in this case, a list of known transcripts provided as the RefSeq Accession Number.

• Extract the sequences of the overlapping ChIP-seq peaks.

• Score each nucleotide for the presence of a transcription factor binding site (TFBS), provided as a position frequency matrix downloaded from the JASPAR database, and compute a relative score for that putative TFBS.

• Filter out the sites with scores below a given threshold.

• Generate a BED file containing the resulting TFBS.

• Intersect the TFBS with activating regulatory elements from the Combined (ChromHMM and Segway) genome segmentation, available at UCSC Genome Browser website, from: Hoffman MM, Ernst J, Wilder SP, Kundaje A, Harris RS, Libbrecht M, Giardine B, Ellenbogen PM, Bilmes JA, Birney E, Hardison RC, Dunham I, Kellis M, Noble WS. Integrative annotation of chromatin elements from ENCODE data. Nucleic Acids Res. 2013 Jan;41(2):827-41. doi: 10.1093/nar/gks1284. Epub 2012 Dec 5.

• Generate a BED file containing the resulting ‘active’ TFBS

**1.1 Define some initial variables**

[ ]: ChIPseq_peaks = '' *#location of ChIP-seq peaks in bed format*

RefSeq_transcripts = '' *#location of transcript data in bed format*

RefSeq_list = '' *#list of RefSeq mRNA to be checked in txt format*

Genome_file = '' *#Genome sequence in fasta format*

PFM_file = '' *#PFM file from JASPAR in PFM format*

JobName = '' *#Name for the output files*

Segmentation_file = '' *#Segmentation file from Combined Segmentation Track*

**1.2 Extract genome coordinates from given transcripts**

[ ]: **import pybedtools**

**import pandas as pd**

**def** filterbytranscript(gene_df, gene_list):

*"""*

*Extracts the rows that contain specific transcripts and their genomic*␣

*,→coordinates*

*Input:*

*- gene_df, a pandas dataframe containing columns with coordinate data and*␣

*,→RefSeq mRNA Accession*

*numbers from whole genome transcripts.*

*- gene_list, a list containing the names of the desired transcripts for*␣

*,→which TFBS will be searched.*

*Output:*

*- intervals, a pandas dataframe containing location and strandness of the*␣

*,→desired transcripts.*

*"""*

intervals = []

**for** gene_name **in** gene_list:

*# Extracts lines matching a specific transcript RefSeq AN*

rows = gene_df[gene_df['name'].str.contains(gene_name)]

*# Extracts relevant information*

rows = rows[['chrom', 'start', 'end', 'name', 'score', 'strand']]

intervals.append(rows) *# Gathers all the transcript data*

intervals = pd.concat(intervals)

print("Transcripts coordinates have been retrieved")

**return** intervals

**def** extend_transcripts(intervals, base_pairs):

*"""*

*Extends the upstream region of the transcripts a given base_pairs amount in*␣

*,→order to include promoter*

*Input:*

*- intervals, a pandas dataframe containing location and strandness of the*␣

*,→desired transcripts.*

*- base_pairs, an integer defining the number of base pairs every coordinate*␣

*,→is desired to be extended in the*

*upstream direction*

*Output:*

*- new_intervals, a pandas dataframe containing location and strandness of*␣

*,→the desired transcripts plus the*

*desired extension*

*"""*

new_intervals = intervals

*# Transform coordinates in numbers to add and substract*

new_intervals['start'] = pd.to_numeric(new_intervals['start'])

new_intervals['end'] = pd.to_numeric(new_intervals['end'])

*# Substract the amount to the 'end' coordinate in 'antisense' transcripts*␣

*,→and add it to the 'start' coordinate in 'sense' ones.*

new_intervals.loc[new_intervals.strand == "-", "end"] = new_intervals.

*,→*loc[new_intervals.strand == "-", "end"] + base_pairs

new_intervals.loc[new_intervals.strand == "+", "start"] = new_intervals.

*,→*loc[new_intervals.strand == "+", "start"] - base_pairs

print("Transcripts have been extended")

**return** new_intervals

[ ]: TF = pybedtools.BedTool(ChIPseq_peaks) *#load ChIP-seq peaks*

genes = pybedtools.BedTool(RefSeq_transcripts).to_dataframe() *#load RefSeq*␣

*,→transcripts*

regions = []

**with** open(RefSeq_list) **as** regions_file:

**for** line **in** regions_file:

regions.append(line.strip())

transcripts = filterbytranscript(genes, regions)

transcripts = extend_transcripts(transcripts, 5000) *#Extend upstream direction*␣

*,→of the transcritps by 5000 bp*

transcripts = pybedtools.BedTool.from_dataframe(transcripts) *#Transform back to*␣

*,→bedtools object*

candidates = TF.intersect(transcripts, u = **True**) *#Intersect the ChIP-seq sites*␣

*,→with the transcripts*

**2 Extract the sequences for those sites**

[ ]: **def** extractSequence(BED_out, FASTAFile):

*"""*

*Gets FASTA sequence for BED TFs peaks*

*Input:*

*- BED_out, a bedtools object containing peaks for specified TFs*

*- FASTAFile, path to FASTA file containing the sequences*

*Output:*

*- seqs, a dictionary containing data from each peak such as chromosome,*␣

*,→start nucleotide, end nucleotide and sequence*

*"""*

**import pybedtools**

**import re**

BED_out = BED_out.sort() *#pre-processing peaks*

BED_out = BED_out.merge()

print("Collecting sequences for those peaks...")

seq = BED_out.sequence(fi = FASTAFile)

print("Sites collected")

**with** open(BED_out.seqfn) **as** SeqFile:

print("Constructing dictionary with peak data...")

data = []

regex = re.compile(r'(.*):(.*)-(.*)') *#regex to extract location data*

complement = str.maketrans('ACTG', 'TGAC') *#complementary bases, needed*␣

*,→to construct reverse complement*

**for** line **in** SeqFile:

**if** line.startswith(">"):

site = line.strip(">**\n**")

(chrom, start, end) = re.search(regex, site).groups()

line = SeqFile.readline() *#next line*

seq = line.strip().upper()

revcomp = seq[::-1].translate(complement)

data.append({'chrom':chrom,

'start':int(start),

'end':int(end),

'seq':seq,

'revcomp':revcomp})

**return** data

[ ]: sites = extractSequence(candidates, Genome_file)

**3 Reading PSSM**

[ ]: **def** readPFM(PFMpath):

*"""*

*Reads a PFM from JASPAR in .pfm format and returns a*

*pandas dataframe containing the absolute counts for each*

*nucleotide*

*Input:*

*- PFMpath, the path for the .pfm file*

*Output:*

*- PFM, a pandas dataframe containing the absolute counts for*

*each of the nucleotides*

*"""*

**import pandas as pd**

PFM = []

**with** open(PFMpath) **as** PFMFile:

**for** line **in** PFMFile:

**if** line.startswith(">"):

**continue**;

tmp = line.strip()

tmp = tmp.split()

PFM.append(tmp)

PFM = dict(zip(['A', 'C', 'G', 'T'], PFM))

PFM = pd.DataFrame.from_dict(PFM).astype('float32').T

PFM.loc['N'] = PFM.min(axis = 0)

**return** PFM

**def** PFMtoPSSM(PFM, pseudo = 1):

*"""*

*Takes a PFM and converts it to a PSSM, taking into account pseudocounts*

*and assuming 0.25 random probability for each nucleotide*

*Input:*

*- PFM, a pandas dataframe containing in rows nucleotides and absolute*␣

*,→counts in columns*

*- pseudo, pseudocount value*

*Output:*

*- PSSM, a pandas dataframe analogous to PFM with log odds ratio of each*␣

*,→nucleotide*

*"""*

**import pandas as pd**

**import numpy as np**

totals = PFM.sum(axis = 0)

PSSM = np.log2( ( ( ( ( PFM + 1 ) / totals) / 0.25 ) ) )

**return** PSSM

[ ]: PFM = readPFM(PFM_file)

PSSM = PFMtoPSSM(PFM)

**3.1 Scoring sites**

[ ]: **def** scanTFBS(site, PSSM, threshold = 0.9):

maxScore = float(PSSM.max(axis = 0).sum()) *# gets the maximum and minimum*␣

*,→scores in order to compute relatives*

minScore = float(PSSM.min(axis = 0).sum())

motifLen = PSSM.shape[1]

putative = []

print("Scoring site", site['chrom'], ":", str(site['start']), "-",␣

*,→*str(site['end']))

currentSeq = site['seq']

currentRevSeq = site['revcomp']

position = -1

**for** nt **in** currentSeq:

position += 1

subseq = currentSeq[position : position+motifLen] *# gets the current*␣

*,→sliding window*

*# Getting score for each nucleotide inside the motif and summing them up*

relScore = [PSSM.loc[nucleotide].iloc[motifpos] **for** nucleotide,␣

*,→*motifpos **in** zip(subseq, list(range(motifLen)))]

relScore = sum(relScore)

relScore = (relScore + abs(minScore)) / (abs(maxScore) + abs(minScore))␣

*,→# computes relative score*

**if** relScore >= threshold:

putative.append({

'chrom':site['chrom'],

'start':site['start']+position,

'end':site['start']+position+motifLen,

'seq':subseq,

'strand':'+',

'relScore':round(relScore, 3)

})

position = -1

*## Same procedure for reverse sequence*

**for** nt **in** currentRevSeq:

position += 1

subseq = currentRevSeq[position : position+motifLen]

relScore = [PSSM.loc[nucleotide].iloc[motifpos] **for** nucleotide,␣

*,→*motifpos **in** zip(subseq, list(range(motifLen)))]

relScore = sum(relScore)

relScore = (relScore + abs(minScore)) / (abs(maxScore) + abs(minScore))

**if** relScore >= threshold:

putative.append({

'chrom':site['chrom'],

'start':site['end']-position-motifLen,

'end':site['end']-position,

'seq':subseq,

'strand':'-',

'relScore':round(relScore, 3)

})

**return** putative

[ ]: **from joblib import** Parallel, delayed

**import multiprocessing**

num_cores = multiprocessing.cpu_count()

putative = Parallel(n_jobs = num_cores)(delayed(scanTFBS)(i, PSSM) **for** i **in**␣

*,→*sites)

putative = [site **for** site **in** putative **if** site != []]

**import itertools**

putative = list(itertools.chain(*putative))

[ ]: **with** open('./output/output_' + JobName + '.bed', 'w') **as** file:

**for** site **in** putative:

name = site["chrom"] + ":" + str(site["start"]) + "-" + str(site["end"])

name = name + "_relScore=" + str(site['relScore'])

name = name + "_motif=" + site['seq']

file.write("**\t**".join([str(site["chrom"]),

str(site["start"]),

str(site["end"]),

name,

str(site["relScore"]),

site["strand"]+"**\n**"])

)

**3.2 Active sites retrieving**

[ ]: putative_sites = pybedtools.BedTool('./output/output_' + JobName + '.bed')

segmentation = pybedtools.BedTool(Segmentation_file)

segmentation = segmentation.to_dataframe()

segmentation = segmentation[segmentation.name.isin(['TSS', 'WE', 'E', 'PF'])]

segmentation = pybedtools.BedTool.from_dataframe(segmentation)

active_sites = putative_sites.intersect(segmentation, u = **True**) *# intersects*␣

*,→the putative sites with active regions*

active_sites.saveas("./output/output_active_"+ JobName +".bed") *# saves as bed*␣

*,→file*
